# Supplementary material for: Arbuscular mycorrhizal fungi in soil, roots and rhizosphere of Medicago truncatula: diversity and heterogeneity under semi-arid conditions
Source: PeerJ. 2019 Mar 1;7:e6401. doi: 10.7717/peerj.6401 (PMC6398376; doi:10.7717/peerj.6401)
Supplement: File S1 — SP1: Plant from Site 1; SP2: Plant from Site 2; SP3: Plant from Site 3; SP4: Plant from Site 4. SS1: Rhizosphere soil from Site 1; SS2: Rhizosphere soil from Site 2; SS3: Rhizosphere soil from Site 3; SS4: Rhizosphere soil from Site 4. SCS1: Bulk soil from Site 1; SCS2: Bulk soil from Site 2; SCS3: Bulk soil from Site 3; SCS4: Bulk soil from Site 4. [file peerj-07-6401-s006.xlsx]

## Sheet: fullTaxonReport
domain	kingdom	tax ID	phylum	tax ID	class	tax ID	order	tax ID	family	tax ID	genus	tax ID	species	tax ID	SP1-OTU	SP1-SEQ	SP1-bootstrap	SP4-OTU	SP4-SEQ	SP4-bootstrap	SCS1-OTU	SCS1-SEQ	SCS1-bootstrap	SCS3-OTU	SCS3-SEQ	SCS3-bootstrap	SS4-OTU	SS4-SEQ	SS4-bootstrap	SS1-OTU	SS1-SEQ	SS1-bootstrap	SCS4-OTU	SCS4-SEQ	SCS4-bootstrap	SCS2-OTU	SCS2-SEQ	SCS2-bootstrap	SS2-OTU	SS2-SEQ	SS2-bootstrap	SP3-OTU	SP3-SEQ	SP3-bootstrap	SP2-OTU	SP2-SEQ	SP2-bootstrap	SS3-OTU	SS3-SEQ
Eukaryota															13	108	100	13	151	100	13	106	100	16	561	100	24	1134	100	26	367	100	29	4247	100	29	329	100	30	207	100	23	486	100	11	572	100	12	1570
Eukaryota	Metazoa	33208	Arthropoda	6656	Arachnida	6854																														1	2	100
Eukaryota	Metazoa	33208	Arthropoda	6656	Arachnida	6854	Cheyletoidea	188547	Demodicidae	188543	Demodex	188544	D.brevis	574145																																		1	1
Eukaryota	Metazoa	33208	Chordata	7711	Mammalia	40674									1	28	100	1	2	100	2	169	100	1	89	100	5	509	(100 - 99 - 95)				5	208	100	1	18	100	1	2	100	1	5	100	1	3	100	2	164
Eukaryota	Metazoa	33208	Chordata	7711	Mammalia	40674	Primates	9443	Hominidae	9604	Homo	9605	H.sapiens	9606													1	1	80
Eukaryota	Metazoa	33208	Chordata	7711	Mammalia	40674	Primates	9443	Cercopithecidae	9527	Macaca	9539	M.fascicularis	9541							1	3	94				1	2	89
Eukaryota	Metazoa	33208	Chordata	7711	Mammalia	40674	Pecora	35500	Bovidae	9895	Budorcas	37180	B.taxicolor	37181													1	3	85				1	3	95
Eukaryota	Alveolata	33630	Apicomplexa	5794	Coccidia	5796	Eucoccidiorida	75739	Eimeriidae	5799					1	2	100	1	1	100	3	10	(95 - 90 - 80)	1	1	100													1	1	90	1	1	80
Eukaryota	Ciliophora	5878	Intramacronucleata	431838	Spirotrichea	33829																																	1	2	90
Eukaryota	Ciliophora	5878	Intramacronucleata	431838	Spirotrichea	33829	Sporadotrichida	693921	Oxytrichidae	57506											2	3	(100 - 90 - 80)	2	2	(85 - 82 - 80)				2	5	(100 - 95 - 90)				1	1	95	1	2	75
Eukaryota	Ciliophora	5878	Intramacronucleata	431838	Spirotrichea	33829	Urostylida	486728	Pseudourostylidae	293814	Pseudourostyla	293815	P.cristata	293816																									1	1	80
Eukaryota	Ciliophora	5878	Intramacronucleata	431838	Litostomatea	5988	Haptorida	5989													2	4	(100 - 92 - 85)
Eukaryota	Ciliophora	5878	Intramacronucleata	431838	Litostomatea	5988	Haptorida	5989	Spathidiidae	375581	Protospathidium	990177	P.muscicola	990178							1	1	85
Eukaryota	Ciliophora	5878	Intramacronucleata	431838	Colpodea	5977	Colpodida	88566	Colpodidae	5978	Colpoda	5979	C.cucullus	63137																1	11	100
Eukaryota	Fungi	4751													17	99	(100 - 94 - 75)	8	33	(100 - 98 - 85)	20	81	(100 - 96 - 80)	15	95	(100 - 99 - 95)	4	69	100	28	201	(100 - 96 - 80)	5	62	(100 - 92 - 75)	18	518	(100 - 93 - 75)	52	483	(100 - 96 - 75)	15	181	(100 - 99 - 95)	8	24	(100 - 98 - 85)	11	71
Eukaryota	Fungi	4751	Basidiomycota	5204																	3	19	(100 - 98 - 95)	6	140	(100 - 89 - 85)	4	7	(100 - 90 - 75)	3	8	(95 - 90 - 85)	2	15	(82 - 78 - 75)	3	44	(100 - 96 - 95)	6	11	(100 - 95 - 80)	1	2	95	2	37	100	3	23
Eukaryota	Fungi	4751	Basidiomycota	5204	Agaricomycetes	155619															1	1	75
Eukaryota	Fungi	4751	Basidiomycota	5204	Agaricomycetes	155619	Agaricales	5338																1	1	85													1	1	95
Eukaryota	Fungi	4751	Basidiomycota	5204	Agaricomycetes	155619	Agaricales	5338	Entolomataceae	71934	Clitopilus	71935	C.prunulus	71936										1	1	80
Eukaryota	Fungi	4751	Basidiomycota	5204	Agaricomycetes	155619	Corticiales	452338	Corticiaceae	5304	Limonomyces	228942	L.roseipellis	228943													1	1	90
Eukaryota	Fungi	4751	Basidiomycota	5204	Agaricomycetes	155619	Cantharellales	36064	Ceratobasidiaceae	5250	Ceratobasidium	5251																								1	2	100
Eukaryota	Fungi	4751	Early_diverging_fungal_lineages	451834	Mucoromycotina	451507	Mucorales	4827	Lichtheimiaceae	499202	Lichtheimia	688353															1	1	100	1	801	100
Eukaryota	Fungi	4751	Early_diverging_fungal_lineages	451834	Mucoromycotina	451507	Mucorales	4827	Lichtheimiaceae	499202	Lichtheimia	688353	L.blakesleeana	101563																1	107	100							2	3	(100 - 97 - 95)							1	1
Eukaryota	Fungi	4751	Early_diverging_fungal_lineages	451834	Mucoromycotina	451507	Mucorales	4827	Lichtheimiaceae	499202	Lichtheimia	688353	L.corymbifera	42458																2	117	(90 - 84 - 78)							1	19	100
Eukaryota	Fungi	4751	Early_diverging_fungal_lineages	451834	Mucoromycotina	451507	Endogonales	4869	Endogonaceae	4870	Endogone	4871			1	2	75
Eukaryota	Fungi	4751	Chytridiomycota	4761																																2	8	(90 - 85 - 80)	2	22	(95 - 92 - 90)
Eukaryota	Fungi	4751	Chytridiomycota	4761	Chytridiomycetes	451435	Spizellomycetales	34478																															2	9	(95 - 90 - 85)
Eukaryota	Fungi	4751	Chytridiomycota	4761	Chytridiomycetes	451435	Spizellomycetales	34478	Spizellomycetaceae	34479																													2	9	(85 - 82 - 80)
Eukaryota	Fungi	4751	Chytridiomycota	4761	Chytridiomycetes	451435	Spizellomycetales	34478	Spizellomycetaceae	34479	Spizellomyces	4815	S.dolichospermus	117818																									1	4	90
Eukaryota	Fungi	4751	Ascomycota	4890											63	1699	(100 - 96 - 75)	39	736	(100 - 95 - 75)	112	1874	(100 - 96 - 75)	71	2318	(100 - 96 - 75)	13	165	(100 - 97 - 80)	145	1527	(100 - 96 - 75)	2	723	100	89	1913	(100 - 97 - 75)	125	1811	(100 - 96 - 75)	44	672	(100 - 95 - 75)	56	1001	(100 - 96 - 75)	32	794
Eukaryota	Fungi	4751	Ascomycota	4890	Dothideomycetes	147541															3	59	(100 - 95 - 85)							4	68	(100 - 92 - 80)	1	1	75	1	7	85	2	3	(100 - 95 - 90)							1	2
Eukaryota	Fungi	4751	Ascomycota	4890	Dothideomycetes	147541	Capnodiales	134362																						1	1	90
Eukaryota	Fungi	4751	Ascomycota	4890	Dothideomycetes	147541	Capnodiales	134362	Davidiellaceae	452563					1	109	80	1	52	100	2	55	80							2	12	(100 - 97 - 95)							1	23	100				3	132	(100 - 93 - 90)
Eukaryota	Fungi	4751	Ascomycota	4890	Dothideomycetes	147541	Capnodiales	134362	Davidiellaceae	452563	Cladosporium	5498																								1	19	100
Eukaryota	Fungi	4751	Ascomycota	4890	Dothideomycetes	147541	Capnodiales	134362	Mycosphaerellaceae	93133	Septoria	39702									1	14	100
Eukaryota	Fungi	4751	Ascomycota	4890	Dothideomycetes	147541	Myriangiales	45676	Elsinoaceae	40995											1	2	100
Eukaryota	Fungi	4751	Ascomycota	4890	Dothideomycetes	147541	Myriangiales	45676	Elsinoaceae	40995	Elsinoe	40996	E.phaseoli	390893							4	66	(100 - 85 - 75)				1	1	100	4	117	(100 - 93 - 85)							1	2	100
Eukaryota	Fungi	4751	Ascomycota	4890	Dothideomycetes	147541	Pleosporales	92860													1	6	100							2	13	100
Eukaryota	Fungi	4751	Ascomycota	4890	Dothideomycetes	147541	Pleosporales	92860	Lophiostomataceae	45147																										1	12	75
Eukaryota	Fungi	4751	Ascomycota	4890	Dothideomycetes	147541	Pleosporales	92860	Pleosporales_incertae_sedis	147498	Heleiosa	742335	H.barbatula	742336																1	4	90
Eukaryota	Fungi	4751	Ascomycota	4890	Dothideomycetes	147541	Pleosporales	92860	Pleosporaceae	28556														1	2	100										1	1	100
Eukaryota	Fungi	4751	Ascomycota	4890	Pezizomycetes	147549	Pezizales	5185																																					1	1	85
Eukaryota	Fungi	4751	Ascomycota	4890	Pezizomycetes	147549	Pezizales	5185	Ascobolaceae	5189	Ascobolus	5190			1	4	85													1	1	100										2	5	(90 - 85 - 80)	1	11	80
Eukaryota	Fungi	4751	Ascomycota	4890	Pezizomycetes	147549	Pezizales	5185	Ascobolaceae	5189	Ascobolus	5190	A.crenulatus	265118																															1	5	80
Eukaryota	Fungi	4751	Ascomycota	4890	Pezizomycetes	147549	Pezizales	5185	Pezizaceae	5186											2	12	(100 - 97 - 95)
Eukaryota	Fungi	4751	Ascomycota	4890	Lecanoromycetes	147547												1	3	80
Eukaryota	Fungi	4751	Ascomycota	4890	Lecanoromycetes	147547	Lecanorales	5197	Lecanoraceae	39933																													1	3	75
Eukaryota	Fungi	4751	Ascomycota	4890	Lecanoromycetes	147547	Teloschistales	107465	Teloschistaceae	88646																													1	6	85
Eukaryota	Fungi	4751	Ascomycota	4890	Sordariomycetes	147550									4	319	(100 - 91 - 75)	4	85	(100 - 93 - 85)	4	73	(100 - 88 - 75)							10	82	(100 - 88 - 75)				4	46	(100 - 87 - 75)	7	70	(100 - 89 - 75)	5	305	(100 - 95 - 85)	7	166	(100 - 95 - 75)
Eukaryota	Fungi	4751	Ascomycota	4890	Sordariomycetes	147550	Melanosporales	452228	Melanosporaceae	452229	Melanospora	40615	M.singaporensis	152778							2	3	(90 - 85 - 80)							1	3	95
Eukaryota	Fungi	4751	Ascomycota	4890	Sordariomycetes	147550	Hypocreales	5125							1	1	75	1	2	80	6	253	(100 - 95 - 85)	1	12	90				15	659	(100 - 90 - 80)				1	4	95	4	23	(100 - 87 - 75)	1	1	80				1	1
Eukaryota	Fungi	4751	Ascomycota	4890	Sordariomycetes	147550	Hypocreales	5125	Cordycipitaceae	474943																													1	17	90
Eukaryota	Fungi	4751	Ascomycota	4890	Sordariomycetes	147550	Hypocreales	5125	Cordycipitaceae	474943	Cordyceps	45234																											4	45	(95 - 87 - 80)
Eukaryota	Fungi	4751	Ascomycota	4890	Sordariomycetes	147550	Hypocreales	5125	Cordycipitaceae	474943	Cordyceps	45234	C.bassiana	176275																1	13	90							3	17	(95 - 81 - 75)							1	10
Eukaryota	Fungi	4751	Ascomycota	4890	Sordariomycetes	147550	Hypocreales	5125	mitosporic_Hypocreales	115136	Trichothecium	231006	T.roseum	47278																												1	1	80
Eukaryota	Fungi	4751	Ascomycota	4890	Sordariomycetes	147550	Hypocreales	5125	mitosporic_Hypocreales	115136	Trichothecium	231006	T.sympodiale	51912																1	1	85
Eukaryota	Fungi	4751	Ascomycota	4890	Sordariomycetes	147550	Hypocreales	5125	mitosporic_Hypocreales	115136	Fusarium	5506									1	1	95													1	4	75	1	2	95
Eukaryota	Fungi	4751	Ascomycota	4890	Sordariomycetes	147550	Hypocreales	5125	mitosporic_Hypocreales	115136	Myrothecium	5531																											2	124	(80 - 77 - 75)
Eukaryota	Fungi	4751	Ascomycota	4890	Sordariomycetes	147550	Hypocreales	5125	mitosporic_Hypocreales	115136	Cylindrocladiella	137494																											1	7	80
Eukaryota	Fungi	4751	Ascomycota	4890	Sordariomycetes	147550	Hypocreales	5125	Nectriaceae	110618											1	9	80
Eukaryota	Fungi	4751	Ascomycota	4890	Sordariomycetes	147550	Hypocreales	5125	Ceratostomataceae	72984	Sphaerodes	152784																		1	4	80
Eukaryota	Fungi	4751	Ascomycota	4890	Sordariomycetes	147550	Hypocreales	5125	Ophiocordycipitaceae	474942											1	1	75
Eukaryota	Fungi	4751	Ascomycota	4890	Sordariomycetes	147550	Coniochaetales	292576																1	14	100
Eukaryota	Fungi	4751	Ascomycota	4890	Sordariomycetes	147550	Coniochaetales	292576	Coniochaetaceae	79807	Coniochaeta	79808												1	4	100
Eukaryota	Fungi	4751	Ascomycota	4890	Sordariomycetes	147550	Xylariales	37989							5	50	100	1	6	100	4	52	(85 - 81 - 80)							3	33	(90 - 86 - 85)				4	44	(95 - 85 - 75)	4	21	(100 - 88 - 80)	3	533	(95 - 88 - 75)	1	62	95	1	3
Eukaryota	Fungi	4751	Ascomycota	4890	Sordariomycetes	147550	Xylariales	37989	Diatrypaceae	42364					1	3	100	1	717	75	1	13	80	1	1	75				4	23	(100 - 87 - 75)							1	2	90				1	1	75
Eukaryota	Fungi	4751	Ascomycota	4890	Sordariomycetes	147550	Xylariales	37989	Amphisphaeriaceae	54958											1	7	100							2	16	(100 - 90 - 80)							2	15	(100 - 95 - 90)
Eukaryota	Fungi	4751	Ascomycota	4890	Sordariomycetes	147550	Xylariales	37989	Amphisphaeriaceae	54958	Pestalotiopsis	37840																														1	1	80
Eukaryota	Fungi	4751	Ascomycota	4890	Sordariomycetes	147550	Calosphaeriales	93808	Calosphaeriaceae	93809	Phaeoacremonium	65412																		1	2	80
Eukaryota	Fungi	4751	Ascomycota	4890	Sordariomycetes	147550	Microascales	5592	Microascaceae	5593	Pseudallescheria	5596																		1	34	90
Eukaryota	Fungi	4751	Ascomycota	4890	Sordariomycetes	147550	Sordariales	5139																															1	2	75
Eukaryota	Fungi	4751	Ascomycota	4890	Sordariomycetes	147550	Sordariales	5139	Chaetomiaceae	35718											1	2	80													1	24	80	2	31	(85 - 82 - 80)
Eukaryota	Fungi	4751	Ascomycota	4890	Sordariomycetes	147550	Sordariales	5139	Sordariaceae	5148	Sordaria	5146	S.macrospora	5147																									1	4	75
Eukaryota	Fungi	4751	Ascomycota	4890	Eurotiomycetes	147545									2	18	(100 - 97 - 95)	2	6	(95 - 85 - 75)	6	176	(100 - 90 - 80)	15	235	(100 - 95 - 75)	1	10	100	14	168	(100 - 94 - 75)	9	1905	(100 - 98 - 85)	12	221	(100 - 91 - 75)	21	310	(100 - 91 - 75)	2	10	(95 - 87 - 80)	3	8	100	16	532
Eukaryota	Fungi	4751	Ascomycota	4890	Eurotiomycetes	147545	Verrucariales	146291	Verrucariaceae	146292														1	5	100
Eukaryota	Fungi	4751	Ascomycota	4890	Eurotiomycetes	147545	Chaetothyriales	34395													1	6	90	5	255	(100 - 91 - 80)				3	40	(100 - 95 - 90)				1	8	100				1	17	100	1	8	90	1	36
Eukaryota	Fungi	4751	Ascomycota	4890	Eurotiomycetes	147545	Chaetothyriales	34395	Herpotrichiellaceae	43219																										2	81	(95 - 92 - 90)
Eukaryota	Fungi	4751	Ascomycota	4890	Eurotiomycetes	147545	Chaetothyriales	34395	Herpotrichiellaceae	43219	Capronia	43220																								2	9	95
Eukaryota	Fungi	4751	Ascomycota	4890	Eurotiomycetes	147545	Eurotiales	5042													1	29	75	1	9	100							1	27	90
Eukaryota	Fungi	4751	Ascomycota	4890	Eurotiomycetes	147545	Eurotiales	5042	Trichocomaceae	28568					1	1	80				3	20	(100 - 90 - 85)	2	73	(85 - 82 - 80)				6	26	(95 - 81 - 75)	1	1	75	4	25	(100 - 92 - 85)	7	63	(100 - 91 - 80)							6	571
Eukaryota	Fungi	4751	Ascomycota	4890	Eurotiomycetes	147545	Eurotiales	5042	Trichocomaceae	28568	Penicillium	5073									5	102	(100 - 95 - 80)	3	94	(100 - 91 - 75)				4	65	(100 - 87 - 75)	4	138	(100 - 96 - 85)	5	120	(100 - 94 - 80)	5	42	(95 - 88 - 75)	1	4	100
Eukaryota	Fungi	4751	Ascomycota	4890	Eurotiomycetes	147545	Eurotiales	5042	Trichocomaceae	28568	Penicillium	5073	P.chrysogenum	5076										1	1	80
Eukaryota	Fungi	4751	Ascomycota	4890	Eurotiomycetes	147545	Eurotiales	5042	Trichocomaceae	28568	Aspergillus	5052									1	1	80	3	46	(90 - 81 - 75)	2	25	(100 - 87 - 75)	4	9	(95 - 81 - 75)							1	2	75				1	8	85
Eukaryota	Fungi	4751	Ascomycota	4890	Eurotiomycetes	147545	Eurotiales	5042	Trichocomaceae	28568	Aspergillus	5052	A.cervinus	41749							1	1	100				1	11	90	1	1	100
Eukaryota	Fungi	4751	Ascomycota	4890	Eurotiomycetes	147545	Eurotiales	5042	Trichocomaceae	28568	Aspergillus	5052	A.awamori	105351													3	2380	80
Eukaryota	Fungi	4751	Ascomycota	4890	Eurotiomycetes	147545	Eurotiales	5042	Trichocomaceae	28568	Byssochlamys	5092	B.spectabilis	264951																						1	4	80
Eukaryota	Fungi	4751	Ascomycota	4890	Eurotiomycetes	147545	Onygenales	33183							1	3	80				4	14	100	3	53	(100 - 93 - 80)	2	239	(95 - 90 - 85)	7	24	(100 - 91 - 85)				2	14	(95 - 92 - 90)	4	46	(100 - 96 - 90)							2	71
Eukaryota	Fungi	4751	Ascomycota	4890	Eurotiomycetes	147545	Onygenales	33183	Arachnomycetaceae	259363	Arachnomyces	130040									2	13	(100 - 87 - 75)	1	11	100				4	30	(100 - 98 - 95)													2	5	(100 - 97 - 95)
Eukaryota	Fungi	4751	Ascomycota	4890	Eurotiomycetes	147545	Onygenales	33183	Arachnomycetaceae	259363	Arachnomyces	130040	A.nodosetosus	130043																															1	3	85
Eukaryota	Fungi	4751	Ascomycota	4890	Eurotiomycetes	147545	Onygenales	33183	Ascosphaeraceae	5103	Ascosphaera	5104	A.apis	5105																																		1	4
Eukaryota	Fungi	4751	Ascomycota	4890	Eurotiomycetes	147545	Onygenales	33183	Arthrodermataceae	34384					3	26	(100 - 93 - 80)				1	7	90				1	4	85							1	3	90	2	22	(90 - 87 - 85)							5	287
Eukaryota	Fungi	4751	Ascomycota	4890	Eurotiomycetes	147545	Onygenales	33183	Onygenaceae	33184																										4	71	(100 - 97 - 90)	1	2	100
Eukaryota	Fungi	4751	Ascomycota	4890	Eurotiomycetes	147545	Onygenales	33183	Gymnoascaceae	37243																										2	5	(85 - 84 - 84)
Eukaryota	Fungi	4751	Ascomycota	4890	Eurotiomycetes	147545	Onygenales	33183	Gymnoascaceae	37243	Arachniotus	166106																																				1	1402
Eukaryota	Fungi	4751	Ascomycota	4890	Eurotiomycetes	147545	Onygenales	33183	Gymnoascaceae	37243	Arachniotus	166106	A.ruber	166107	1	1	75	1	18	75																						1	1	95				1	37
Eukaryota	Fungi	4751	Ascomycota	4890	Eurotiomycetes	147545	Onygenales	33183	Gymnoascaceae	37243	Kraurogymnocarpa	180784	K.trochleospora	180785										1	5	75
Eukaryota	Fungi	4751	Ascomycota	4890	Eurotiomycetes	147545	Onygenales	33183	Gymnoascaceae	37243	Gymnascella	78593	G.hyalinospora	78596																									1	1	85
Eukaryota	Fungi	4751	Glomeromycota	214504											5	52	100	1	12	100																						4	16	100	4	257	(100 - 97 - 90)
Eukaryota	Fungi	4751	Glomeromycota	214504	Glomeromycetes	214506									2	4	(90 - 87 - 85)	1	1	75																1	2	75				6	73	(100 - 95 - 85)
Eukaryota	Fungi	4751	Glomeromycota	214504	Glomeromycetes	214506	Glomerales	36750																												1	2	95							1	5	75
Eukaryota	Fungi	4751	Glomeromycota	214504	Glomeromycetes	214506	Glomerales	36750	Glomeraceae	36751								1	3	100										1	2	95										11	297	(100 - 95 - 75)
Eukaryota	Fungi	4751	Glomeromycota	214504	Glomeromycetes	214506	Glomerales	36750	Glomeraceae	36751	Glomus	4875			14	172	(100 - 96 - 80)	8	64	(100 - 93 - 80)	13	169	(100 - 97 - 80)	3	20	(100 - 96 - 95)				13	53	(100 - 91 - 75)				2	4	100	1	7	90	23	265	(100 - 96 - 75)	22	175	(100 - 98 - 85)
Eukaryota	Fungi	4751	Glomeromycota	214504	Glomeromycetes	214506	Diversisporales	214509	Diversisporaceae	308925								1	15	90																						1	5	75
Eukaryota	Fungi	4751	Glomeromycota	214504	Glomeromycetes	214506	Diversisporales	214509	Diversisporaceae	308925	Diversispora	308926			1	1	80																									3	75	(100 - 90 - 80)
Eukaryota	Fungi	4751	Glomeromycota	214504	Glomeromycetes	214506	Diversisporales	214509	Scutellosporaceae	617235	Scutellospora	27382																														1	4	95
Eukaryota	Fungi	4751	Glomeromycota	214504	Glomeromycetes	214506	Diversisporales	214509	Scutellosporaceae	617235	Scutellospora	27382	S.dipurpurescens	78547																												1	1	90
Eukaryota	Viridiplantae	33090	Chlorophyta	3041	Chlorophyceae	3166	Chlorosarcinales	138177																						1	1	100
Eukaryota	Viridiplantae	33090	Streptophyta	35493											11	48	(100 - 94 - 75)	19	1266	(100 - 98 - 90)	2	2	(100 - 92 - 85)	5	10	(100 - 97 - 90)	1	1	100	2	2	(100 - 87 - 75)	5	28	(100 - 99 - 95)	1	1	75	1	3	75	21	1265	(100 - 95 - 75)	13	389	(100 - 96 - 75)
Eukaryota	Viridiplantae	33090	Streptophyta	35493	core_eudicotyledons	91827	Caryophyllales	3524													3	8	(100 - 96 - 95)																						2	60	(100 - 90 - 80)
Eukaryota	Viridiplantae	33090	Streptophyta	35493	core_eudicotyledons	91827	Caryophyllales	3524	Aizoaceae	3542											1	1	80																						1	1	80
Eukaryota	Viridiplantae	33090	Streptophyta	35493	core_eudicotyledons	91827	Caryophyllales	3524	Aizoaceae	3542	Delosperma	85189	D.echinatum	85190	1	1	85
Eukaryota	Viridiplantae	33090	Streptophyta	35493	core_eudicotyledons	91827	Caryophyllales	3524	Amaranthaceae	3563	Spinacia	3561	S.oleracea	3562																															1	1	95
Eukaryota	Viridiplantae	33090	Streptophyta	35493	core_eudicotyledons	91827	Caryophyllales	3524	Amaranthaceae	3563	Atriplex	3550	A.canescens	35922																															1	1	95
Eukaryota	Viridiplantae	33090	Streptophyta	35493	core_eudicotyledons	91827	Caryophyllales	3524	Polygonaceae	3615																																1	8	85	1	2	90
Eukaryota	Viridiplantae	33090	Streptophyta	35493	core_eudicotyledons	91827	Caryophyllales	3524	Polygonaceae	3615	Polygonum	46786	P.chinense	54804																1	1	75
Eukaryota	Viridiplantae	33090	Streptophyta	35493	core_eudicotyledons	91827	Saxifragales	41946										1	1	85
Eukaryota	Viridiplantae	33090	Streptophyta	35493	Liliopsida	4447												2	2	(90 - 81 - 73)
Eukaryota	Viridiplantae	33090	Streptophyta	35493	Liliopsida	4447	Asparagales	73496	Xanthorrhoeaceae	27232								1	1	90
Eukaryota	Viridiplantae	33090	Streptophyta	35493	Liliopsida	4447	Asparagales	73496	Xanthorrhoeaceae	27232	Asphodelus	49697	A.aestivus	49698				1	40	100																						2	80	(100 - 90 - 80)	1	52	95
Eukaryota	Viridiplantae	33090	Streptophyta	35493	Liliopsida	4447	Poales	38820										1	1	75
Eukaryota	Viridiplantae	33090	Streptophyta	35493	Liliopsida	4447	Poales	38820	Poaceae	4479					1	1	100	4	220	(100 - 87 - 80)	2	3	(95 - 92 - 90)										2	8	(90 - 87 - 85)	3	10	(100 - 98 - 95)	2	2	100	5	47	(100 - 95 - 85)	10	56	(100 - 91 - 75)
Eukaryota	Viridiplantae	33090	Streptophyta	35493	Liliopsida	4447	Poales	38820	Poaceae	4479	Triticum	4564	T.aestivum	4565																						1	13	90	1	4	89	1	1	90
Eukaryota	Viridiplantae	33090	Streptophyta	35493	Liliopsida	4447	Poales	38820	Poaceae	4479	Sorghum	4557	S.bicolor	4558																									1	32	85							1	1
Eukaryota	Viridiplantae	33090	Streptophyta	35493	Liliopsida	4447	Poales	38820	Poaceae	4479	Hordeum	4512	H.vulgare	4513																						1	6	90	1	6	85	2	5	95
Eukaryota	Viridiplantae	33090	Streptophyta	35493	Liliopsida	4447	Poales	38820	Joinvilleaceae	4736	Joinvillea	4737	J.ascendens	38723				1	10	85
Eukaryota	Viridiplantae	33090	Streptophyta	35493	lamiids	91888	Lamiales	4143	Plantaginaceae	156152	Plantago	26867	P.rugelii	101993	2	7	(100 - 97 - 95)	3	11	(95 - 90 - 80)										1	2	100	1	3	75							1	3	95	1	1	100
Eukaryota	Viridiplantae	33090	Streptophyta	35493	fabids	91835	Cucurbitales	71239	Cucurbitaceae	3650	Citrullus	3653	C.lanatus	3654																						1	1	90							1	1	100
Eukaryota	Viridiplantae	33090	Streptophyta	35493	fabids	91835	Fagales	3502	Casuarinaceae	3520	Casuarina	3521	C.equisetifolia	3523										1	6	100
Eukaryota	Viridiplantae	33090	Streptophyta	35493	fabids	91835	Malpighiales	3646	Euphorbiaceae	3977								1	2	90																						1	1	90
Eukaryota	Viridiplantae	33090	Streptophyta	35493	fabids	91835	Fabales	72025	Fabaceae	3803					22	148	(100 - 93 - 80)	9	74	(100 - 95 - 85)													1	4	100							24	177	(100 - 91 - 75)	18	488	(100 - 93 - 80)
Eukaryota	Viridiplantae	33090	Streptophyta	35493	fabids	91835	Fabales	72025	Fabaceae	3803	Medicago	3877	M.truncatula	3880	8	191	(95 - 85 - 80)	3	223	(95 - 88 - 85)																						5	1102	(95 - 86 - 75)	9	71	(90 - 81 - 75)
Eukaryota	Viridiplantae	33090	Streptophyta	35493	fabids	91835	Fabales	72025	Fabaceae	3803	Astragalus	20400																					1	5	75							5	201	(95 - 83 - 75)
Eukaryota	Viridiplantae	33090	Streptophyta	35493	fabids	91835	Fabales	72025	Fabaceae	3803	Astragalus	20400	A.austrosibiricus	158321	9	978	(95 - 83 - 75)	2	50	(80 - 76 - 73)																						8	129	(90 - 81 - 73)	5	1496	(85 - 79 - 73)
Eukaryota	Viridiplantae	33090	Streptophyta	35493	campanulids	91882	Dipsacales	4199	Caprifoliaceae	4200					2	5	(95 - 92 - 90)
Eukaryota	Viridiplantae	33090	Streptophyta	35493	campanulids	91882	Asterales	4209	Asteraceae	4210								2	30	(81 - 78 - 75)													1	154	80
Eukaryota	Viridiplantae	33090	Streptophyta	35493	campanulids	91882	Asterales	4209	Asteraceae	4210	Tragopogon	13730	T.dubius	45322				2	3	(95 - 90 - 85)	1	1	77	1	60	75							1	6	78	1	29	80				2	142	90
Eukaryota	Viridiplantae	33090	Streptophyta	35493	campanulids	91882	Asterales	4209	Asteraceae	4210	Arctium	4216	A.lappa	4217				2	4	85
Eukaryota	Viridiplantae	33090	Streptophyta	35493	malvids	91836	Sapindales	41937	Rutaceae	23513	Citrus	2706	C.maxima	37334																																		1	1
Eukaryota	Viridiplantae	33090	Streptophyta	35493	malvids	91836	Brassicales	3699																																		1	1	95
Eukaryota	Viridiplantae	33090	Streptophyta	35493	malvids	91836	Brassicales	3699	Brassicaceae	3700											1	1	85	1	2	75													1	4	85	2	4	75
Eukaryota	Viridiplantae	33090	Streptophyta	35493	malvids	91836	Brassicales	3699	Brassicaceae	3700	Camelina	71323	C.sativa	90675				1	42	80	1	3	90							2	21	(89 - 87 - 85)
Eukaryota	Viridiplantae	33090	Streptophyta	35493	malvids	91836	Brassicales	3699	Brassicaceae	3700	Sinapis	3727	S.alba	3728				2	7	(80 - 76 - 73)																			3	4	(95 - 93 - 90)	1	38	89
Eukaryota	Viridiplantae	33090	Streptophyta	35493	malvids	91836	Brassicales	3699	Brassicaceae	3700	Arabidopsis	3701	A.lyrata	59689							2	21	(90 - 87 - 84)	1	80	94				1	13	73				1	12	95	1	38	95				1	5	90
Eukaryota	Viridiplantae	33090	Streptophyta	35493	malvids	91836	Brassicales	3699	Resedaceae	26958	Reseda	26963	R.alba	28546																						1	1	100	1	5	100
Eukaryota	Viridiplantae	33090	Streptophyta	35493	malvids	91836	Malvales	41938	Malvaceae	3629					1	1	85	1	7	85													1	2	100	1	1	95
Eukaryota	Viridiplantae	33090	Streptophyta	35493	malvids	91836	Malvales	41938	Malvaceae	3629	Malva	96479	M.sylvestris	145754	4	41	(100 - 96 - 85)	3	346	100	1	6	100	2	29	100							2	71	100	1	8	100				3	101	(100 - 98 - 95)
Prokaryotes	Bacteria	2	Proteobacteria	1224	Alphaproteobacteria	28211	Rhizobiales	356	Rhizobiaceae	82115	Sinorhizobium	28105	S.meliloti	382				1	1	100																						3	6	(100 - 93 - 80)
Prokaryotes	Bacteria	2	Proteobacteria	1224	Alphaproteobacteria	28211	Rhizobiales	356	Rhizobiaceae	82115	Sinorhizobium	28105	S.medicae	110321	1	4	100
Prokaryotes	Bacteria	2	Proteobacteria	1224	Gammaproteobacteria	1236	Pseudomonadales	72274	Pseudomonadaceae	135621	Pseudomonas	286															2	3	100																1	1	100
Prokaryotes	Bacteria	2	Proteobacteria	1224	Gammaproteobacteria	1236	Pseudomonadales	72274	Pseudomonadaceae	135621	Pseudomonas	286	P.entomophila	312306																																		1	1
Prokaryotes	Bacteria	2	Proteobacteria	1224	Gammaproteobacteria	1236	Pseudomonadales	72274	Pseudomonadaceae	135621	Pseudomonas	286	P.fluorescens	294	1	1	100	2	30	100	1	36	100	1	42	100	1	5	100				2	89	100				1	1	100	2	5	100	1	50	100	2	74
Prokaryotes	Bacteria	2	Actinobacteria	201174	Actinobacteria_(class)	1760	Actinomycetales	2037	Propionibacteriaceae	31957	Propionibacterium	1743	P.acnes	1747							1	1	100																						1	1	100
															SP1-OTU	SP1-SEQ	SP1-bootstrap	SP4-OTU	SP4-SEQ	SP4-bootstrap	SCS1-OTU	SCS1-SEQ	SCS1-bootstrap	SCS3-OTU	SCS3-SEQ	SCS3-bootstrap	SS4-OTU	SS4-SEQ	SS4-bootstrap	SS1-OTU	SS1-SEQ	SS1-bootstrap	SCS4-OTU	SCS4-SEQ	SCS4-bootstrap	SCS2-OTU	SCS2-SEQ	SCS2-bootstrap	SS2-OTU	SS2-SEQ	SS2-bootstrap	SP3-OTU	SP3-SEQ	SP3-bootstrap	SP2-OTU	SP2-SEQ	SP2-bootstrap	SS3-OTU	SS3-SEQ
														Total	202	4128		150	4278		250	3520		170	4277		70	4571		329	4688		77	7700		212	3647		325	3598		243	6277		196	5160		104	5657
Total 202 4128 150 4278 250 3520 170 4277 70 4571 329 4688 77 7700 212 3647 325 3598 243 6277 196 5160 104 5657
[truncated: 1 more columns]
